# Supplementary material
Source: MDPI journal article supplement (https://www.mdpi.com/2073-4395/12/2/291)
Supplement: s1 [file s1 › agronomy-1550258-Supplementary.xlsx]

## Sheet: Table S1
Table S1. Statistics of meteorological data of wulan wusu agricultural meteorological experimental station in 2014 and 2015.
Date	Air pressure (hpa)	Average temperate (◦C)	Maximum temperature (◦C)	Minumun temperature (◦C)	Relative humidity (%)	Evaporation capacity (mm)	Average wind velocity in 2 minutes (m s-1)	Vapour pressure (hpa)	Precipitation (mm)
2014-01-01	977.3	-17.2	-11.1	-22.7	84	0.2	1	1.4
2014-01-02	978.9	-17.7	-15.7	-19.9	84	0	0.9	1.3
2014-01-03	975.5	-18.6	-16	-21.2	84	0	0.7	1.2
2014-01-04	969.6	-16.5	-11.5	-19.7	82	0	0.9	1.4
2014-01-05	974.6	-13.7	-8.5	-19.3	85	0	1	1.9
2014-01-06	984.4	-15.5	-11.9	-20.4	83	0	1	1.6	2.4
2014-01-07	988.1	-21.8	-18	-25.8	79	0	0.8	0.9
2014-01-08	980.6	-22	-18.7	-25.3	77	0	1	0.8
2014-01-09	976.7	-23	-17.7	-28.1	76	0	0.8	0.8
2014-01-10	982.2	-20.5	-14.9	-24.5	78	0.2	0.9	1
2014-01-11	982.7	-22.1	-18.3	-25.4	81	0.1	1	0.8
2014-01-12	975.4	-19.5	-13.3	-25.4	78	0.1	1.2	1.1
2014-01-13	974.4	-20.5	-15.1	-23.8	83	0	0.5	10
2014-01-14	976.4	-19.5	-13.1	-23.5	79	0.2	0.7	1.1
2014-01-15	973.5	-19.2	-14.2	-22.5	81	0.2	1	1.1
2014-01-16	975.2	-15.4	-7.7	-21.1	76	0.3	1.1	1.5
2014-01-17	979.4	-9.5	-2.9	-16.3	82	0.1	1	2.5	1.2
2014-01-18	982.6	-12.1	-5.7	-17.8	90	0.2	0.7	2.2
2014-01-19	734.2	-12.7	-9.4	-14.3	84	0	0.8	2
2014-01-20	974.8	-18.2	-13.4	-22.5	85	0	0.8	1.3
2014-01-21	966.5	-16.6	-12.7	-21.6	86	0	0.8	1.5
2014-01-22	967.9	-11.5	-7.3	-16.2	85	0.2	1.3	2.2
2014-01-23	972.9	-9.7	-7.5	-10.9	85	0.2	0.9	2.5	0.5
2014-01-24	972.3	-11.2	-8	-13.2	86	0.1	0.8	2.2
2014-01-25	966.8	-11.6	-6.9	-15.6	83	0	1.2	2.1
2014-01-26	970.5	-7.6	-3.7	-15.4	87	0	1.6	3.1	2.7
2014-01-27	967	-7.9	-6.1	-8.4	89	0	1.1	3	0.3
2014-01-28	967.2	-6.9	-2.9	-12.2	81	0.6	2.1	3
2014-01-29	965.4	-8	-4.8	-10	89	0.2	1	3
2014-01-30	956.4	-8	-5.1	-10.1	89	0.2	0.9	3
2014-01-31	963.5	-5.6	-2.8	-9.2	87	0.4	1.2	3.5
2014-02-01	978.3	-11.5	-4.1	-14.9	81	0.4	1.4	2.1	3
2014-02-02	982.9	-17.6	-15	-19.5	78	0.1	1.5	1.2	1.2
2014-02-03	978	-18.6	-14.2	-22.5	75	0.3	1.2	1.1	0.1
2014-02-04	975.8	-16.1	-13	-19.9	76	0	1	1.4	0.9
2014-02-05	976.9	-15.3	-13.2	-20.2	80	0	1.6	1.5	0.8
2014-02-06	978.2	-19.1	-13.8	-24.8	79	0.3	0.8	1.1	0.8
2014-02-07	974	-19.2	-16.2	-24.3	77	0	1.5	1	0.1
2014-02-08	976.9	-16.2	-12.7	-18.3	76	0.4	1	1.3	0
2014-02-09	977	-18.7	-10.5	-23.8	72	0.3	0.9	1	0.1
2014-02-10	977.3	-17.5	-10.2	-22.7	74	0.4	1.2	1.2
2014-02-11	975.6	-16.9	-13.2	-19.8	77	0.2	1	1.3
2014-02-12	977.5	-18.4	-14.5	-21.9	79	0.2	1.1	1.1
2014-02-13	977.5	-16.3	-13.2	-20.6	76	0.2	0.6	1.3
2014-02-14	975.5	-15.4	-10.6	-18.2	77	0.3	0.5	1.4
2014-02-15	975.3	-14.4	-11.6	-17.2	80	0.1	0.8	1.6
2014-02-16	978	-14.3	-12.4	-15.3	82	0	0.9	1.7	1.6
2014-02-17	981.9	-19.6	-14.7	-23.5	80	0.3	0.6	1.1	0.2
2014-02-18	976.3	-18.2	-13.9	-22.5	75	0.2	1	1.1	0.2
2014-02-19	968.6	-16	-10.2	-21.8	73	0.4	1	1.3
2014-02-20	967.3	-13.8	-9.1	-17.6	77	0.5	0.9	1.7
2014-02-21	968.3	-9.5	-1.1	-17.6	75	0.4	1	2.4
2014-02-22	967.5	-8	-3.4	-11.2	92	0.2	1	3.1
2014-02-23	963.7	-4.1	0.4	-8.6	81	0.4	1.2	3.6
2014-02-24	977	-2.7	-0.5	-4.6	88	0.1	1.4	4.4	4.6
2014-02-25	988.4	-12.5	-4.6	-18.7	76	1.2	2	1.9	4
2014-02-26	979.7	-15.7	-10.3	-21.1	77	0.3	1.8	1.4	0.2
2014-02-27	978.2	-16.8	-8	-23.5	73	0.6	1.7	1.2	0.2
2014-02-28	977.2	-12.5	-7.7	-15.6	70	0.8	1.3	1.6
2014-03-01	974.3	-14.9	-9.6	-20.3	78	0.7	0.8	1.6
2014-03-02	974	-10.9	-5.6	-15.3	71	0.6	0.7	1.9
2014-03-03	978.3	-14	-8.4	-18.5	79	0.8	0.9	1.7
2014-03-04	977.5	-13.3	-6.4	-18.7	80	0.6	0.6	1.8
2014-03-05	976.3	-13.6	-7.9	-19.1	79	0.6	0.6	1.8
2014-03-06	972	-13.1	-7.4	-17.3	78	0.7	0.8	1.8
2014-03-07	968.8	-12	-6	-16.7	78	0.8	0.4	1.9
2014-03-08	965.4	-10.3	-4	-16.3	77	0.8	0.4	2.2
2014-03-09	967.6	-4.9	0.9	-10	79	0.4	0.1	3.5	1.8
2014-03-10	978.1	-2.6	0.1	-4.2	90	0.8	0.3	4.6	3.6
2014-03-11	980.7	-7.2	-2.6	-12.8	87	0.8	0.9	3.2
2014-03-12	976.6	-5.9	-4.3	-7	90	0.8	0.8	3.6	0.1
2014-03-13	967.9	-4.3	0.1	-8.3	76	1.2	0	3.3	0.1
2014-03-14	962.5	-6.9	-2.2	-12.6	81	0.9	0.9	3	0
2014-03-15	966.5	-1.9	5.4	-7.1	79	1.2	1.5	4.3
2014-03-16	971.7	1.4	4.2	-0.8	77	2	1.8	5.2
2014-03-17	968.3	-0.1	4.1	-4.3	81	1.5	1.2	4.9
2014-03-18	967	1.2	5.3	-2.1	78	1	1.6	5.1
2014-03-19	973.7	4.2	12.3	-0.5	79	2.1	1.4	6.5
2014-03-20	968.7	6.2	11.6	1.7	75	2	2.1	7.1
2014-03-21	965.9	8.2	12.5	2.3	68	2.4	2.1	7.4
2014-03-22	962.4	7.5	13.5	1	75	2.1	0.9	7.7
2014-03-23	962.4	8.6	15	1.6	75	2.6	1.4	8.2
2014-03-24	958.9	10.1	16.5	3.7	74	2.4	1.4	9
2014-03-25	962.3	8.4	15	5.6	77	1	2.7	8.4	1.3
2014-03-26	969.4	7	12.3	2.5	63	3	1.9	6.1	2
2014-03-27	964.8	6.1	13.2	-1.1	65	2.9	1.4	5.6
2014-03-28	964.9	8.3	14	2.3	57	3.3	2.4	6
2014-03-29	966.1	8.8	17	0.4	57	6.4	2.2	5.7
2014-03-30	964.7	9.2	18.1	0	53	4.2	1.4	5.4
2014-03-31	965.2	13.1	21.5	5.1	43	5.4	1.9	6
2014-04-01	960.7	13.3	22.8	3.5	43	3	2.2	5.5
2014-04-02	959.4	14.1	23.6	4.3	37	3.3	1.8	4.8
2014-04-03	960.7	14.5	21.9	5.2	30	3	2.7	4.3
2014-04-04	957.7	17.5	24.1	11.4	26	3.3	2.2	4.9
2014-04-05	957.8	16.5	22.7	10.5	33	3.5	3.7	5.9
2014-04-06	960.8	14.9	20.6	9.4	47	2.8	1.9	7.7
2014-04-07	961.9	15.8	19.8	11.7	49	1.9	2.2	8.7
2014-04-08	973.3	9.5	17.1	5.7	60	2	3	7	2.8
2014-04-09	968	10.3	16.4	3.8	53	3.1	1.5	6
2014-04-10	961.7	12.6	22.7	2.9	46	3.5	1.8	5.6
2014-04-11	957.7	15.4	22.1	9.6	33	4.3	2.7	5.1
2014-04-12	960.5	16.1	20.1	11.5	48	3	2.6	8.6
2014-04-13	961.3	15.3	21.2	10.9	56	3.3	3	9.5
2014-04-14	967.8	6.4	15.1	4.3	89	0	4.9	8.6	17.8
2014-04-15	971	5.8	8.8	3	65	1.7	2.4	5.9	2.4
2014-04-16	970.7	5.6	8.2	2.2	64	1.7	1.7	5.7
2014-04-17	970.1	7.5	12.7	2.2	50	2.6	1.9	4.9
2014-04-18	969.6	8.4	16.1	0.4	52	2.7	1.3	5
2014-04-19	969.4	13.1	19	5.8	39	3.4	2.6	5.4
2014-04-20	964.2	12.2	20.9	3	44	3.6	1.3	5.3
2014-04-21	960	17.2	24.7	9.4	36	3.3	1.4	6.1
2014-04-22	953.4	17.1	23	10.9	36	3.9	3.7	6.8
2014-04-23	970	6.2	21.7	1.3	44	4.1	5.7	4.4	9.2
2014-04-24	972.1	5	13	-3.2	44	3.8	2.3	3.3
2014-04-25	964	7.2	14.7	-1.1	44	3.4	1.6	4.1
2014-04-26	963.6	13.8	22.1	7.9	37	3.8	3.7	5.7
2014-04-27	965.4	16.1	23.4	8.3	48	3.4	1.5	7.9
2014-04-28	959.1	16.4	22.1	10.3	43	3.6	3.4	7.7
2014-04-29	969.5	10.6	18.2	7.7	69	1.2	2.7	8.6	6.7
2014-04-30	974.8	11.8	17.5	6.9	44	3.1	2.4	5.5
2014-05-01	968.6	13	21.5	4.3	42	3.5	1.3	5.3
2014-05-02	963.3	17.1	24.2	9.6	33	3.6	2.4	5.7
2014-05-03	961.2	20	28.3	10.6	35	3.7	1.4	6.6
2014-05-04	958.3	21.3	30.6	10.9	36	4.4	1.4	7.3
2014-05-05	957.8	22.9	32.2	12.8	31	4.5	1.5	7
2014-05-06	959.1	24.4	32.4	14	26	4.9	1.7	7
2014-05-07	955.7	22.3	30.9	14.3	29	5.1	2.8	6.7
2014-05-08	956	19.2	26.3	13.1	17	9.5	6.8	3.8
2014-05-09	964.2	19	24.5	14.2	18	5.6	1.6	3.7
2014-05-10	957.9	18.7	27.2	9.3	26	4.6	2	4.7
2014-05-11	958.6	17.9	26.3	14.1	21	5.6	1.6	4.1
2014-05-12	963.8	16.6	21.7	10.6	26	5.6	3	4.6
2014-05-13	968	18.3	24.3	13.1	22	7.2	3	4.6
2014-05-14	960.7	22.6	29	14.8	23	5.8	2.9	6.1
2014-05-15	952.9	22.9	28.5	18.4	24	5.8	2.6	6.4
2014-05-16	956.3	19.2	25.1	14	22	5.7	2.3	4.7
2014-05-17	961.9	20.4	26.3	14.5	22	5.8	2.9	5
2014-05-18	958	23.3	30.6	15.3	20	5.3	2.2	5.2
2014-05-19	952.1	21.2	29.8	15.4	27	5.3	1.6	6.7
2014-05-20	948	22.6	32	13.7	35	5.8	3.1	8.6
2014-05-21	957	17.9	23.2	13.3	37	6.3	2.7	7.5	0.5
2014-05-22	960	12.7	21.3	10.1	68	4.3	2.4	9.5	3.8
2014-05-23	967.2	14.8	20.1	10	48	3.9	2.4	7.6
2014-05-24	967.1	17.9	26.1	8.2	44	4.1	1.8	8
2014-05-25	961.9	22.3	30.9	10.1	33	4.9	1.4	7.6
2014-05-26	959.9	25.6	32.8	15.5	27	5.1	2	8.5
2014-05-27	953.8	25.8	34.3	15.1	37	5.4	1.3	10.5
2014-05-28	954	28.4	34	22.6	28	6.5	3	10.6
2014-05-29	949.1	28.2	35.2	18.5	28	6	1.8	9.7
2014-05-30	945.6	26.6	34.1	22	32	6.2	2.3	11.2
2014-05-31	959	16	28.6	10.9	59	5.1	2	10.4	13.1
2014-06-01	964.4	14.8	20	8.1	60	3.6	1.4	9.5
2014-06-02	962.3	17.4	21.7	12.6	48	3.4	1.2	8.8
2014-06-03	964.1	17.4	20.9	14.9	54	3.3	1.9	10.6
2014-06-04	963.6	18.7	25	12.5	39	4.5	2.6	7.7
2014-06-05	958.2	22	29.1	13.6	31	5.7	1.9	7
2014-06-06	959.2	20.6	27.9	14.3	40	6.1	2.5	9.4
2014-06-07	954	21.4	28.9	10.9	37	6.1	1.5	8.2
2014-06-08	953.3	23.8	30.8	15.9	38	4.6	2.2	10.5
2014-06-09	956.3	24	29.1	17	43	5.8	2.2	12.5	0.3
2014-06-10	961.5	20.4	27.2	14.2	54	4.2	2	11.9	0.5
2014-06-11	961.5	22.5	30.5	12.8	45	6.1	1.6	10.8
2014-06-12	955.9	24.1	32.3	12.9	38	6	1.7	9.4
2014-06-13	951.7	26.4	34.9	15.8	31	5.9	1.8	9.4
2014-06-14	949	29	36.1	18.2	28	6.5	1.8	10.5
2014-06-15	949.3	29.4	36.6	19.4	30	6.7	1.5	11.4
2014-06-16	956.8	25.3	35.3	17.9	46	3	3.5	14.5	3.9
2014-06-17	956.3	24.9	30	19.4	40	5.5	3.1	12.1
2014-06-18	955.4	27	31.9	20	31	6.8	3	10.7
2014-06-19	953.6	27.6	33	22.3	35	5.9	2.1	12.9
2014-06-20	956.3	21.7	32.2	19.2	68	4.7	1.4	17.5	1.8
2014-06-21	954.8	25	32.9	16.5	55	4	1.2	15.4
2014-06-22	953.5	27.4	33.1	21.9	33	6.6	2	11.5
2014-06-23	951.3	27.8	34.2	21.5	34	6.6	2.1	13
2014-06-24	948.8	26.6	32.4	17.5	40	4.8	1.3	13.3
2014-06-25	951.2	26.9	32.5	23.1	40	5.6	1.9	14.2
2014-06-26	956.1	27.3	32.4	20.7	40	5.9	1.9	14.2
2014-06-27	957.3	27.7	32.4	22	37	6.5	1.7	13.4
2014-06-28	954.8	27.7	34.9	19	43	3.6	1.5	15.6
2014-06-29	953.3	28.7	36.8	19.4	38	5.4	1.5	13.5
2014-06-30	953.5	29.1	35.7	23.6	35	6.7	2.8	14.3	0.2
2014-07-01	953.8	28.1	33.4	21.8	38	6.4	1.7	14.2
2014-07-02	953.1	25.6	34.8	17.4	51	7	2.6	16.3
2014-07-03	954.4	23.7	27.7	19.1	62	5.7	2.2	17.5	0.6
2014-07-04	951.3	24.2	32.2	14.5	51	6.6	2	14.1	0
2014-07-05	955.3	20.2	30.8	18.3	71	4.2	1.4	16.8	1.1
2014-07-06	957.7	22.2	28.8	13.4	57	4.3	1.3	14.1	0.1
2014-07-07	957.6	22.9	29.4	16	56	5.4	1.9	14.7	0.8
2014-07-08	954.9	22.8	30.8	15.7	56	5.9	2.1	14.5
2014-07-09	955.7	23.9	29.3	17.7	49	6.3	2.7	13.7
2014-07-10	956.1	23.9	31.2	15	53	5.9	1.6	14.3
2014-07-11	954.8	25.1	33.7	15	52	4	1.4	15.2
2014-07-12	953.2	26.1	34.6	16.3	53	4.7	1.2	17.7
2014-07-13	950.2	27.2	36	19.5	53	5.7	1.4	18.4
2014-07-14	951.2	27.4	32.9	21.2	49	7.2	2.3	17.6
2014-07-15	950.9	25.5	33.6	18.5	65	6.7	2.6	19.9	0.8
2014-07-16	954.3	24.4	30.6	20.8	51	6.5	2	15.1
2014-07-17	955.4	21.9	28.7	15.8	57	5.4	1.6	14
2014-07-18	955	23.6	27.4	19.6	47	4.8	1.8	13.4	0.3
2014-07-19	953.7	23.4	31.3	14.8	48	5	1.6	12.6
2014-07-20	951.9	24.3	33.3	15.2	48	5.3	1.8	13.1
2014-07-21	949.9	26	33.9	17.3	47	5.1	1.3	15
2014-07-22	952.6	30.4	35.7	26.1	35	7.7	1.8	15.3
2014-07-23	950	26.7	35.1	18.5	53	5.1	1	17.3
2014-07-24	950.7	24.9	33.7	22	55	5.8	1.9	17.2	0.5
2014-07-25	954.6	23.8	31.4	16.1	56	4.8	1.5	14.9
2014-07-26	953.1	24.3	32.4	14.8	53	5.1	1.1	15.1
2014-07-27	950.8	25.5	34.5	18.8	49	5.1	1.4	15.9
2014-07-28	946.4	27.1	35.5	18	44	6.2	2.1	16
2014-07-29	950.8	23.5	32.6	17.6	60	6.8	2.3	16.8	3.2
2014-07-30	956.2	21.7	27	16.9	52	6	2	12.9
2014-07-31	957.7	19.6	26.2	14.7	62	4.5	1.5	13.8
2014-08-01	960.1	19.8	27	12.7	61	4	1.9	13.1
2014-08-02	961.8	21.2	26.1	15.5	47	6.1	1.5	11.3
2014-08-03	956.7	19.8	28.6	9.5	56	5.8	1.4	11.4
2014-08-04	952.5	22.2	31.3	13.2	49	4.9	1.6	12.7
2014-08-05	951.9	26.7	30.7	20.4	40	4.5	2.4	13.7
2014-08-06	954.9	24.6	31.3	17.1	53	5.2	1.1	15.4
2014-08-07	952.9	23.3	30.7	16.6	49	5	1.3	13.9
2014-08-08	953.4	24.5	30.6	18.2	48	5.1	1.3	14.4
2014-08-09	955.2	22.7	29.8	16.1	52	5.5	2	13.9
2014-08-10	957.8	21.8	29.3	13.4	59	5.5	1.7	14.2
2014-08-11	956.9	22.8	31.6	13.3	57	4.6	1.3	14
2014-08-12	953.8	23.4	33.9	13.5	54	5.3	1.1	14.1
2014-08-13	951.8	25	33.5	15.9	49	4.6	1.2	15.4
2014-08-14	949.9	26.6	35.4	21.7	52	5.4	1.4	18.7
2014-08-15	947.9	25.3	34.3	17.4	52	4.4	1.3	16
2014-08-16	951.2	26.1	32.9	19.3	46	6.1	2.5	15.6
2014-08-17	957.6	21.5	27.7	19.1	60	5.6	2.1	15.2	0.2
2014-08-18	962.4	22.1	25.2	19.2	57	3.2	1	151	0
2014-08-19	962.7	20.5	25.1	18.9	80	2.4	0.9	19.3	1.4
2014-08-20	961.2	25.2	31.1	19.2	47	3.9	2.8	14.3	0.2
2014-08-21	957.5	28.4	32.7	21.1	35	5.2	1.8	13.5	1.4
2014-08-22	955.4	25.4	31.5	16.1	43	2.1	1.9	13
2014-08-23	955	23	30.9	14.6	50	4.6	1.7	13.4
2014-08-24	954.8	23.7	33	14.1	51	5	1.2	13.8
2014-08-25	952.8	25	33.8	15.1	51	4	1.2	14.7
2014-08-26	951	25.6	35.8	17.4	57	5	1.8	17.7
2014-08-27	957.9	25.5	30.5	20.3	48	6.1	1.5	15
2014-08-28	961.5	19.9	27	12	58	6.3	1.5	12.6
2014-08-29	959.7	19.8	28.2	10.3	52	5.4	2.1	10.6
2014-08-30	960.1	20.9	30.4	11.4	49	4.6	1.5	11.2
2014-08-31	958.4	21.7	31.8	11.5	47	5.7	2.1	10.4
2014-09-01	954.8	21.5	32.4	11.3	49	4.7	1.1	11.1
2014-09-02	952.6	24.3	34	15.4	51	4.2	1.4	14.9
2014-09-03	952.9	24.6	31.3	17	43	5.9	1.5	12.6
2014-09-04	955.7	21.5	27.5	16.3	54	5.2	2	13.2
2014-09-05	956.5	21.8	27	16.6	47	4.5	1.5	11.6	0.1
2014-09-06	952.8	19.6	29.2	10.1	51	4.5	1	10.7
2014-09-07	960	19.1	26.9	14.4	60	4.9	2.3	12.8	3
2014-09-08	960.7	16.4	26.1	6.7	59	4	1.6	9.4
2014-09-09	956	18.9	29.1	8.7	50	2.8	0.9	10.3
2014-09-10	955.3	17.7	26.9	9.1	54	3.6	1.1	10.5
2014-09-11	959.5	17.5	23.2	9.5	49	5.4	1.8	9.2
2014-09-12	968	14.7	19.9	9.4	45	5.7	2	7.3
2014-09-13	966	11.8	21.1	3.3	51	4.9	1.9	5.7
2014-09-14	964.5	14.3	22.8	6.6	39	3.8	1.5	5.6
2014-09-15	959.9	13.7	24.8	3.6	49	4	1.2	6.4
2014-09-16	960.2	16.8	21.9	8.3	38	3.4	1.5	7.4
2014-09-17	960	15.7	26.3	6.1	52	3.6	1.2	7.9
2014-09-18	956.3	16.9	27.8	8.5	50	3.3	1.6	9.1
2014-09-19	961.2	16.5	24.4	11.4	57	4.4	2.1	10.3	0.2
2014-09-20	974	11.5	16.3	8.6	65	4.3	2.3	8.5	16.3
2014-09-21	969	9.3	17.9	1.7	70	2.9	1	7.5
2014-09-22	966.2	10.7	19.4	2.8	66	2.7	1.2	7.6
2014-09-23	963.6	11.7	19.7	4.5	63	2.2	1.8	7.8
2014-09-24	961.2	13.3	19.5	8.6	71	2.6	1.6	10.7	3.9
2014-09-25	959.3	12.4	21.1	4.8	74	1.7	0.8	10
2014-09-26	958.9	15.5	25.5	7.4	70	1.9	0.4	11.9
2014-09-27	956.2	16.8	26.1	9.8	69	2.1	0.9	12.7
2014-09-28	959	15.3	21.1	12.3	65	2	1.4	11.3	0.1
2014-09-29	962.9	14.7	20.9	8.7	71	2	2.1	11.7
2014-09-30	963	15.4	23.7	8	69	2.4	1.3	11.4
2014-10-01	961.2	14.5	18.8	9.5	73	1.8	1.5	11.9
2014-10-02	966.3	13.2	18.3	6.8	67	2.3	1.1	9.8
2014-10-03	966.4	12.7	22.1	4.7	65	2.6	0.9	8.7
2014-10-04	965.5	14.4	20.9	7.1	55	2.9	2.3	8.7
2014-10-05	969.8	13.5	18.6	10.4	67	2.2	1	10.1
2014-10-06	967.6	12.5	19.5	4.3	63	2.4	2	8.6
2014-10-07	961.4	11.9	20.2	6.1	71	2.3	1.1	9.7
2014-10-08	958.7	12.6	20.3	6.5	72	2.1	3.1	9.9
2014-10-09	975.1	7.6	12	5.3	75	2.8	1.9	7.8	11.7
2014-10-10	982.8	5.9	11	2.8	80	1.9	1.7	7.3	7.1
2014-10-11	978.2	3	10.2	-2.7	76	2	0.8	5.5	0.1
2014-10-12	972.3	4.2	12.8	-2.2	70	1.6	0.8	5.4
2014-10-13	969.3	5.8	16.1	-1.4	72	1.8	1	6.3
2014-10-14	970.6	9.5	18.7	0.8	64	2.2	1.1	7
2014-10-15	967.6	9	16.8	2.4	64	1.9	0.9	7.1
2014-10-16	968.6	9.7	21.2	2.6	67	1.7	0.7	7.5
2014-10-17	964.4	9.6	20	2.3	66	1.8	0.8	7.4
2014-10-18	962.1	11.4	20.3	3.8	57	1.8	0.7	7.1
2014-10-19	958.7	9.3	19.6	2.8	63	1.7	1	7
2014-10-20	960.8	11.5	20.5	4.3	58	1.6	1.2	7.2
2014-10-21	962.7	11.3	19.6	3.9	59	1.9	0.9	7.2
2014-10-22	968.2	11.2	18.4	5.3	69	1.6	0.7	8.9
2014-10-23	959.9	10	18.4	4.9	72	1.4	0.9	8.5
2014-10-24	961.5	13.3	20.5	7.4	60	1.4	1.4	8.8
2014-10-25	962.7	12.1	17.8	8.1	75	1.4	0.7	10.4
2014-10-26	961	10.7	17.3	5.5	80	1.3	0.7	10.1
2014-10-27	966.5	7.1	12.6	3	87	2.3	2	8.8	5.8
2014-10-28	980.2	1.8	3.9	0.5	68	2.8	2.1	4.7	2.3
2014-10-29	977.9	1.3	6.9	-3.8	70	1.5	0.9	4.5
2014-10-30	975.4	1.1	7.2	-3.8	78	1.7	1.1	5.1
2014-10-31	979.9	2.3	7.7	-2.7	71	1.2	0.8	5
2015.3.1		-4.425	1.6	-9.6
2015.3.2		-7.45	-1	-11.3
2015.3.3		-5.475	-0.2	-9.8
2015.3.4		-4.85	1	-11.1
2015.3.5		-3.7	2.2	-9.2
2015.3.6		-1.925	3.9	-6.7
2015.3.7		-0.35	2.7	-3.5
2015.3.8		-1.075	2.4	-3.8
2015.3.9		0.65	3.9	-1.9
2015.3.10		1.75	6	-1.6
2015.3.11		2.825	5.9	-0.1
2015.3.12		0.45	4.5	-1.8					0.2
2015.3.13		0.275	5.9	-6.7					3.1
2015.3.14		0.275	5.5	-4.8
2015.3.15		3.25	9.2	-2.5
2015.3.16		2.425	6.9	-1
2015.3.17		1.875	6.9	-3.4
2015.3.18		1.975	5.8	-1.8
2015.3.19		2.475	8.5	-2.9
2015.3.20		3.35	10.6	-3.7
2015.3.21		4.775	10.3	0.4
2015.3.22		6.625	14.6	-0.8
2015.3.23		7.45	14.9	0.2
2015.3.24		10.825	18.8	4.2
2015.3.25		11.35	15.7	7.9					8.2
2015.3.26		7.275	12.6	2.8
2015.3.27		5.925	13.2	-0.2
2015.3.28		8.6	11.4	5.5					0
2015.3.29		8.725	14.8	2.5					0.1
2015.3.30		5.9	12.9	0					0.1
2015.3.31		-3.375	0.2	-4.8					0.8
2015-04-01		-3.8	-1.6	-5.1					1.5
2015-04-02		-2.6	-0.2	-3.7					0.1
2015-04-03		-0.7	4.6	-7					0.2
2015-04-04		1.6	7.4	-3.6
2015-04-05		4.1	11.5	-2.6
2015-04-06		7.1	11.2	1.2
2015-04-07		8.5	17.1	1.6
2015-04-08		11.4	20.3	2.1
2015-04-09		15.2	21.1	9.9
2015-04-10		14.3	22.7	5.2
2015-04-11		15.8	24.7	6.3
2015-04-12		17.1	26.4	7.5
2015-04-13		20.2	30.2	11.1
2015-04-14		18.6	28.2	14.8
2015-04-15		13.1	18.3	9.5
2015-04-16		10.1	15.6	8.8					15.2
2015-04-17		12.5	17.7	8.8					3.5
2015-04-18		12.6	19.8	5.1
2015-04-19		15.5	21.9	8.6
2015-04-20		14.7	22.6	6.5
2015-04-21		18.9	25.4	14
2015-04-22		21	26.4	15.7
2015-04-23		20.5	29.4	10.9
2015-04-24		21.1	31.4	10.6
2015-04-25		23.9	31.1	17.4
2015-04-26		23	31.9	13.1
2015-04-27		19.7	30.3	16.4
2015-04-28		17.4	21.7	13.4
2015-04-29		16.6	24.2	7.7
2015-04-30		16.5	23.4	10.7
2015-05-01		18.4	25.8	8.2
2015-05-02		18.8	28.2	10.3
2015-05-03		20.1	29	10.7
2015-05-04		21.6	27	17.4
2015-05-05		22.3	27.4	16.6					0.1
2015-05-06		22.9	29	15.8
2015-05-07		21.7	30.1	13.8
2015-05-08		24	31.1	14.7
2015-05-09		24.7	30.7	15.6					1.8
2015-05-10		22.9	29.4	17
2015-05-11		23.4	29.6	16.5
2015-05-12		22.2	28.7	17.9					3
2015-05-13		22	26.1	16.4
2015-05-14		19.4	25.5	12.2
2015-05-15		23.3	32.3	14.1
2015-05-16		24.4	30.4	17.9
2015-05-17		21.2	29	17.4
2015-05-18		17.7	20.4	15.8					9.7
2015-05-19		21.1	26.2	15.8					0
2015-05-20		22.7	30	16.4
2015-05-21		24.3	31.7	15.1
2015-05-22		23.6	31	17.2
2015-05-23		18.7	26.8	15					4.1
2015-05-24		17.2	22.6	14.1
2015-05-25		19.5	24.2	15.2
2015-05-26		23.3	29.5	17.9
2015-05-27		19.7	27.6	13.4					3.8
2015-05-28		21	28	15.2
2015-05-29		22.9	30.3	15.5
2015-05-30		23.7	30.2	17.5
2015-05-31		19.1	27.3	13.9					0.9
2015-06-01		14.8	22.1	11.8					7.2
2015-06-02		16	23.2	7.8
2015-06-03		21.2	27.9	13.3
2015-06-04		23.3	32.3	13
2015-06-05		26.1	33	18.8
2015-06-06		27.2	33	21.1					0.8
2015-06-07		27.1	33.4	20.9
2015-06-08		26.5	32.8	20.2					2.3
2015-06-09		24	32.6	17.9					3.3
2015-06-10		19.9	23.4	18.1					0.3
2015-06-11		19.4	26.9	11.5
2015-06-12		23.2	28.1	17.3					0.2
2015-06-13		26	33.6	16.2
2015-06-14		27.3	35.2	18.2
2015-06-15		24.8	32.6	21.4
2015-06-16		19.8	25.1	15.6					10.2
2015-06-17		21.2	26.7	15.5
2015-06-18		20.5	26.5	16.4					0
2015-06-19		22.4	29.1	12.4
2015-06-20		23.9	30.7	14.4
2015-06-21		25	32.6	16
2015-06-22		26.4	30.5	21.6
2015-06-23		24.5	31.9	19.1					0.1
2015-06-24		26.9	34	18.9
2015-06-25		27.7	35.4	20.2
2015-06-26		27.6	33.4	21.4
2015-06-27		24.9	31.2	21.5					1.1
2015-06-28		21.7	26.7	19					10.9
2015-06-29		25.8	31.9	20.6					0
2015-06-30		25	34	14.3
2015-07-01		25.8	32.4	19.1
2015-07-02		27.3	32	20.5
2015-07-03		28.4	35.7	18.4					0
2015-07-04		28.8	35	20					0
2015-07-05		22.6	33.4	18.2					1.9
2015-07-06		19.5	23.7	15.4					4.4
2015-07-07		20.3	27.7	10.7
2015-07-08		21.8	29.8	11.3
2015-07-09		24.1	30.7	17
2015-07-10		25.6	32.8	16.8					0
2015-07-11		22.4	27.1	17.3					1
2015-07-12		22.2	28	13.3
2015-07-13		24	32.4	13.6
2015-07-14		27.4	34.9	19
2015-07-15		30.1	36.9	21.6
2015-07-16		29.4	37.1	18.9
2015-07-17		28.4	36.2	18.7
2015-07-18		31.1	36.2	26.2					0
2015-07-19		28.7	36.4	19.8
2015-07-20		29.3	38.3	18.9
2015-07-21		29	37.8	19.2
2015-07-22		30.5	38.7	21.3
2015-07-23		30	36.4	23.6
2015-07-24		30	35.8	24.5
2015-07-25		28.2	34.8	24.1					0.9
2015-07-26		28.5	33	22.6
2015-07-27		25.3	33.3	17
2015-07-28		27.9	35.4	21
2015-07-29		23.4	32.7	19.6					3.3
2015-07-30		24	32.5	15.9
2015-07-31		25.8	31.3	20.8
2015-08-01		22.4	30.4	15.9
2015-08-02		27.2	34.7	20.4
2015-08-03		28.6	35.6	20.8
2015-08-04		27.6	34.9	20.4
2015-08-05		25.7	32.9	17.6
2015-08-06		28.5	37	17.6
2015-08-07		27.4	39.1	16.5
2015-08-08		29.2	36.2	24.8
2015-08-09		23.3	31	18.3					2.7
2015-08-10		22.4	30.3	13.2
2015-08-11		19.3	29	16.3					6.2
2015-08-12		20.2	30.2	10.9
2015-08-13		23	34	12.5
2015-08-14		21.5	31.5	18.4
2015-08-15		18.6	23.8	14					12.1
2015-08-16		17.7	25.4	9.6
2015-08-17		18.5	27.2	9.1
2015-08-18		20.2	30.2	9.8
2015-08-19		22	32.7	11.5
2015-08-20		23	35	12.7
2015-08-21		25.4	35.4	15.1
2015-08-22		25.6	34.9	16.3
2015-08-23		21.6	33.5	18.3					0.4
2015-08-24		19.6	25	14.6					1
2015-08-25		21	27.1	15.7
2015-08-26		21.8	28.7	16
2015-08-27		21.1	26.6	15.2
2015-08-28		18.9	26.3	15.5					3
2015-08-29		18.9	23	15.6					5.8
2015-08-30		19.8	26.6	13.3
2015-08-31		21	27.4	16.6
2015-09-01		20.1	26.3	13.2
2015-09-02		23.3	30.3	13.3
2015-09-03		21.9	30.6	12.5
2015-09-04		22.1	27.8	17.5					0.1
2015-09-05		17.4	25.6	13.1					0
2015-09-06		17	23.1	10.9					0.5
2015-09-07		18	24.2	10.5
2015-09-08		17.4	26.4	8.3
2015-09-09		16.1	25.3	8.8
2015-09-10		18.9	27.4	9.8
2015-09-11		19.2	29.2	7.9
2015-09-12		22.1	31.6	13.7
2015-09-13		19.7	30.6	11.7
2015-09-14		15.9	22.1	12.2					5.9
2015-09-15		14.9	19.1	11.9					0.1
2015-09-16		14.3	22.2	6.9
2015-09-17		15.9	22.8	5.5
2015-09-18		15.6	25.5	6.1
2015-09-19		17.9	26.5	8.1
2015-09-20		18	23.8	14.6					0.6
2015-09-21		17.4	27.7	8.8					0.3
2015-09-22		18	24.3	13.4
2015-09-23		13.3	18.4	10.3					0.3
2015-09-24		12.2	21	4.6
2015-09-25		13.4	17.7	8.6
2015-09-26		11.5	15.5	8.8					1.7
2015-09-27		9	13.7	3.9
2015-09-28		6.6	10.8	5.6					3.8
2015-09-29		7	12	4.1					2.1
2015-09-30		8	17.9	-2.2
2015-10-01		8.5	19	0.2
2015-10-02		12.6	22.2	5.5
2015-10-03		14.5	27	4.5
2015-10-04		18	28.3	8.4
2015-10-05		15.8	23.6	9.3
2015-10-06		13.6	19.3	11
2015-10-07		10.4	17.2	2.1
2015-10-08		9	19.4	1
2015-10-09		10.4	20.4	2.7
2015.10.10		12.9	23.5	5.1
2015.10.11		13.3	24.5	5.7
2015.10.12		13.1	22.9	5.1
2015.10.13		15.9	22	9.5
2015.10.14		14.4	20.6	9.9
2015.10.15		8.9	15.7	6.9					3.9
2015.10.16		9	12.9	5.4
2015.10.17		7.7	13.5	2
2015.10.18		8.4	14.8	2.4
2015.10.19		8.7	12.1	7.5					6.2
2015.10.20		8.7	11.9	5.3
2015.10.21		7.7	14	0.8
2015.10.22		5.8	13.8	-0.8
2015.10.23		7.2	9.8	4.8
2015.10.24		5.4	8.7	3.7					0.4
2015.10.25		4.3	10	-1.6
2015.10.26		2.6	9.5	-2.8
2015.10.27		3.5	11.8	-3.1
2015.10.28		6.1	8.6	-47.5
2015.10.29		6.1	11.7	0.8
2015.10.30		2.7	9.4	-2.1
2015.10.31		5.6	11.7	1.3

## Sheet: Table S2
Table S2. The field fertilizer amount of each plot for Zhonghuang 35 in 2014.
Treatment	Fertilizer amount in June			Fertilizer amount in July			Fertilizer amount in August			Total amount			NPK amount (kg/block)
	Urea	Monoammonium Phosphate	Potassium chloride	Urea	Monoammonium Phosphate	Potassium chloride	Urea	Monoammonium Phosphate	Potassium chloride	Urea	Monoammonium Phosphate	Potassium chloride	N	P2O5	K2O
1	0	0	0	0	0	0	0	0	0	0	0	0	0	0	0
2	0	0.675	0	0	0.54	0	0	0.135	0	0	1.34	0	0	0.7	0.455
3	0.235	0.64	0.35	0.47	0.51	0.35	0.235	0.13	0	0.945	1.275	0.695	0.59	0.78	0.43
4	0.63	0	0.35	1.26	0	0.35	0.63	0	0	2.515	0	0.695	1.155	0	0.43
5	0.59	0.32	0.35	1.185	0.255	0.35	0.59	0.065	0	2.365	0.64	0.695	1.165	0.385	0.43
6	0.555	0.64	0.35	1.11	0.51	0.35	0.555	0.13	0	2.225	1.275	0.695	1.175	0.78	0.43
7	0.515	0.975	0.35	1.035	0.78	0.35	0.515	0.195	0	2.075	1.945	0.695	1.185	1.185	0.43
8	0.555	0.64	0	1.11	0.51	0	0.555	0.13	0	2.225	1.275	0	1.175	0.78	0
9	0.555	0.64	0.17	1.11	0.51	0.17	0.555	0.13	0	2.225	1.275	0.34	1.175	0.78	0.21
10	0.875	0.64	0.35	1.75	0.51	0.35	0.875	0.13	0	3.5	1.275	0.695	1.765	0.78	0.43
11	0.245	0.285	0.31	0.49	0.23	0.31	0.245	0.06	0	0.98	0.575	0.625	0.52	0.345	0.39
12	0.21	0.565	0.15	0.415	0.45	0.15	0.21	0.115	0	0.835	1.125	0.3	0.52	0.69	0.185
13	0.59	0.32	0.17	1.185	0.255	0.17	0.59	0.065	0	2.365	0.64	0.34	1.165	0.385	0.21

## Sheet: Table S3
Table S3. The field fertilizer amount of each plot for Zhonghuang 35 in 2015.
Treatment	Fertilizer amount in June			Fertilizer amount in July			Fertilizer amount in August			Fertilizer amount in September			Total amount (kg/block)
	Urea	Monoammonium Phosphate	Potassium chloride	Urea	Monoammonium Phosphate	Potassium chloride	Urea	Monoammonium Phosphate	Potassium chloride	Urea	Monoammonium Phosphate	Potassium chloride	Urea	Monoammonium Phosphate	Potassium chloride
1	0	0	0	0	0	0	0	0	0	0	0	0	0	0	0
2	0	0.39	0	0	0.07	0	0	0.08	0	0	0.18	0	0	1.05	0
3	0.06	0.33	0.28	0.08	0.06	0.06	0.1	0.07	0.01	0.14	0.16	0	0.75	0.89	0.49
4	0.16	0	0.28	0.21	0	0.06	0.27	0	0.01	0.38	0	0	1.97	0	0.49
5	0.15	0.17	0.28	0.19	0.03	0.06	0.25	0.04	0.01	0.35	0.08	0	1.86	0.45	0.49
6	0.14	0.33	0.28	0.18	0.06	0.06	0.24	0.07	0.01	0.33	0.16	0	1.74	0.89	0.49
7	0.13	0.5	0.28	0.17	0.09	0.06	0.22	0.11	0.01	0.31	0.24	0	1.62	1.34	0.49
8	0.14	0.33	0	0.18	0.06	0	0.24	0.07	0	0.33	0.16	0	1.74	0.89	0
9	0.14	0.33	0.14	0.18	0.06	0.03	0.24	0.07	0	0.33	0.16	0	1.74	0.89	0.24
10	0.23	0.33	0.28	0.29	0.06	0.06	0.37	0.07	0.01	0.52	0.16	0	2.73	0.89	0.49
11	0.07	0.17	0.28	0.09	0.03	0.06	0.12	0.04	0.01	0.17	0.08	0	0.87	0.45	0.49
12	0.06	0.33	0.14	0.08	0.06	0.03	0.1	0.07	0	0.14	0.16	0	0.75	0.89	0.24
13	0.15	0.17	0.14	0.19	0.03	0.03	0.25	0.04	0	0.35	0.08	0	1.86	0.45	0.24
14	0.14	0.33	0.42	0.18	0.06	0.09	0.24	0.07	0.01	0.33	0.16	0	1.74	0.89	0.73

## Sheet: Table S4
Table S4. The growth period and irrigation amount in 2014 and 2015.
Year	BBCH scale	000	005	600	605	609	700	701	709	800	905		Growth period (d)
	Item	Sowing date	Seeding data	Initial flowering date	Full-blossom date	Initial pod date	Pod date	Seed filling date	Full seed date	Beginning date	Yellow ripening data
2014	Growth stage	4.14	5.1	5.21	6.18	7.1	7.24	7.31	8.16	9.3	9.14		137
	Irrigation date	5.11	6.18	7.1	7.7	7.15	7.24	7.31	8.8	8.16	8.27	9.3
	Irrigation amount per mu	45.85	61.1	20.5	42.1	34	59.4	28.81	30.57	37.36	35.7	46.1
	Fertilize				√	√	o	√	√	o	√	√
2015	Growth stage	4.25	5.4	6.7	6.14	7.13	7.2	7.25	8.18	8.31	9.13		132
	Irrigation date	4.26	6.14	7.2	7.13	7.2	7.27	8.4	8.18	8.27	9.7	9.13
	Irrigation amount per mu	28	43.3	29.08	35.2	40.07	50	44.7	42	29.8	20	24.64
	Fertilize		√	o	√	√	√	√	√	√	o	√

## Sheet: Table S5
Table S5. The defintion and description information for 31 soybean traits.
Trait Name	Full Name	Alais	Classification	Description	Ranges, Unit of Measurement
Yield	Grain yield	T1	Y	Seed yield was collected at harvest, converting the seed weight from individual plots to kilograms per hactare	kg ha-1
PH	Plant height	T2	Y	The height of the cotyledon node to the apex growth point of the plant	cm
FPH	First pod height	T3	Y	The height, in centimeters, of a pod from cotyledon node to the lowest pod	cm
SD	Stem diameter	T4	Y	The diameter of the third internode of the main stem	cm
NN	Number of nodes on main stem	T5	Y	Main stem, from cotyledon nodes to terminal nodes, excluding cotyledon nodes and terminal inflorescence	Ranges is 17.60-18.72
BN	Branch number	T6	Y	The number of podded branches on the main stem, effective branches having at least 2 nodes, not including secondary branches	Ranges is 0.66-1.33
PN	Pod number	T7	Y	The sum of the effective and inactive pods of a plant	Ranges is 49.95-72.65
SNPT	Seed number per plant	T8	Y	All immature seeds, insect-eating seeds and diseased seeds are included except unformed seeds	Ranges is 121.45-183.9
SWP	Seed weight per plant	T9	Y	Sieve 20 strains of beans to remove impurities, including unripe, insect food and diseased seeds, weigh and calculate the weight (g/strain)	g
HSW	100-seed weight	T10	Y	100 whole mature beans were randomly selected to be weighed (g), and the two 100 beans were weighed. If the difference between the two was more than 0.5g, the samples were re-sampled and weighed, and the average value was taken	g
SNPD	Seed number per pod	T11	Y	The quotient of the number of seeds per plant divided by the number of effective pods per plant	Ranges is 2.36-2.54
HI	Harvest index	T12	Y	The ratio of economic yield to biological yield of a crop	Ranges is 0.50-0.57
PDB	Biomass per pod	T13	B	The total pod amount of living organic matter (dry weight) per plant	g
LB	Biomass per leaf	T14	B	The total leaf amount of living organic matter (dry weight) per plant	g
SB	Biomass per stem	T15	B	The total stem amount of living organic matter (dry weight) per plant	g
PTB	Biomass per plant	T16	B	The total plant amount of living organic matter (dry weight) per plant	g
Nseed	N content in seed	T17	N	The nitrogen content in the seeds	g kg-1
Npod	N content in pod	T18	N	The nitrogen content in the pods	g kg-1
Nleaf	N content in leaf	T19	N	The nitrogen content in the leafs	g kg-1
Nstem	N content in stem	T20	N	The nitrogen content in the stems	g kg-1
Pseed	P content in seed	T21	N	The phosphorus content in the seeds	g kg-1
Ppod	P content in pod	T22	N	The phosphorus content in the pods	g kg-1
Pleaf	P content in leaf	T23	N	The phosphorus content in the leafs	g kg-1
Pstem	P content in stem	T24	N	The phosphorus content in the stems	g kg-1
Kseed	K content in seed	T25	N	The potassium content in the seeds	g kg-1
Kpod	K content in pod	T26	N	The potassium content in the pods	g kg-1
Kleaf	K content in leaf	T27	N	The potassium content in the leafs	g kg-1
Kstem	K content in stem	T28	N	The potassium content in the stems	g kg-1
Protein	Protein content	T29	N	The percentage of protein in the seeds	%
Oil	Oil content	T30	N	The percentage of oil in the seeds	%
Water	Water content	T31	N	The percentage of water in the seeds	%
*Y: Traits related to yield; B: Traits related to biomass; N: Traits related to nutrition.
